# Supplementary material
Source: HighWire-hosted journal article supplement (https://diabetes.diabetesjournals.org/content/suppl/2008/01/22/db07-1697)
Supplement: db071697onlineappendix_figure2.pdf [file db071697onlineappendix_figure2.pdf]

Online appendix 2: Association between cytokines and metabolic parameters twelve months after diagnosis

| Variables     | IL-1 $\beta$ |              | IL-6         |                   | <u>CCL-2</u> |              | TNF- $\alpha$ |              | adiponectin |       |
|---------------|--------------|--------------|--------------|-------------------|--------------|--------------|---------------|--------------|-------------|-------|
|               | r            | p            | r            | p                 | r            | p            | r             | p            | r           | p     |
| IL-1ra        | <b>0.130</b> | <b>0.045</b> | <b>0.329</b> | <b>&lt;0.0001</b> | <b>0.135</b> | <b>0.038</b> | 0.042         | 0.522        | -0.09       | 0.161 |
| IL-1 $\beta$  |              |              | 0.035        | 0.588             | 0.103        | 0.114        | 0.030         | 0.644        | -0.08       | 0.226 |
| IL-6          |              |              |              |                   | 0.022        | 0.737        | 0.005         | 0.935        | -0.04       | 0.511 |
| <u>CCL-2</u>  |              |              |              |                   |              |              | <b>0.144</b>  | <b>0.027</b> | -0.05       | 0.438 |
| TNF- $\alpha$ |              |              |              |                   |              |              |               |              | 0.070       | 0.281 |

Given are Spearman correlation coefficients (r) and p-values. Statistical significant correlations are indicated bold.
