# Supplementary material
Source: HighWire-hosted journal article supplement (https://diabetes.diabetesjournals.org/content/suppl/2008/01/22/db07-1697)
Supplement: db071967onlineappendix_figure1.pdf [file db071967onlineappendix_figure1.pdf]

Online appendix 1: Association between cytokines and metabolic parameters six months after diagnosis

| Variables     | IL-1 $\beta$ |               | IL-6         |                   | <u>CCL-2</u> |                   | TNF- $\alpha$ |              | adiponectin |       |
|---------------|--------------|---------------|--------------|-------------------|--------------|-------------------|---------------|--------------|-------------|-------|
|               | r            | p             | r            | p                 | r            | p                 | r             | p            | r           | p     |
| IL-1ra        | <b>0.220</b> | <b>0.0007</b> | <b>0.342</b> | <b>&lt;0.0001</b> | <b>0.308</b> | <b>&lt;0.0001</b> | <b>0.130</b>  | <b>0.047</b> | -0.07       | 0.302 |
| IL-1 $\beta$  |              |               | <b>0.238</b> | <b>0.0002</b>     | <b>0.134</b> | <b>0.040</b>      | 0.115         | 0.080        | -0.02       | 0.762 |
| IL-6          |              |               |              |                   | <b>0.179</b> | <b>0.006</b>      | 0.055         | 0.396        | -0.03       | 0.596 |
| <u>CCL-2</u>  |              |               |              |                   |              |                   | <b>0.152</b>  | <b>0.020</b> | -0.02       | 0.788 |
| TNF- $\alpha$ |              |               |              |                   |              |                   |               |              | 0.097       | 0.139 |

Given are Spearman correlation coefficients (r) and p-values. Statistical significant correlations are indicated bold.
